# Supplementary material
Source: publisher figshare collection journal article supplement (https://gsajournals.figshare.com/ndownloader/files/11038763)
Supplement: Supplementary file 1 [file 11038763]

## Sheet: Sheet1
Primer Number	Primer Name	Primer sequence (5'-3')	TM	Comments
General primers
AMSLP-6	L4440-for	CGCCTTTGAGTGAGCTGATACCG	65
AMSLP-7	L4440-rev	TTGGGAAGGGCGATCGGTGC	65
AMSLP-14	Vidal RNAi library for	GTTTTCCCAGTCACGACGTT	58
AMSLP-15	Vidal RNAi library for	TGGATAACCGTATTACCGCC	58
Detection of deletions	Deletion Name
AMSLP-1	atfs-1	TCATTCTGACCTCATACCACTTCC	64
AMSLP-2	atfs-1	TGC TGA TGA CCA TGT GGA TGT CC	64
AMSLP-56	coq-1 (ok749) outside	AA CTT CAC GCA GAG GTC AGA GTG	64
AMSLP-57	coq-1 (ok749) outside	GTG GAA AAA TGT TAC GGC CGA CTG	65
AMSLP-58	coq-1 (ok749) inside	CTC TGT AGC TGT AGG ATT GTC G	62
AMSLP-63	coq-2 (ok1266) outside for	CAA GTA CGG TTC CCG ATC TCG AC	66
AMPLS-64	coq-2 (ok1266) inside rev	ATT TAG ATC CTA CCG TAA CCC GTG	65
AMSLP-65	coq-2 (ok1266) outside rev	TGA AAT TTA TTT GGA AGG AGA CGG AG	63
AMLSP-175	HMGS-1 in the deleted sequence 5' (primer D)	TTAGCATACTTGGCAGCAGATG	60
AMLSLP-178	HMGS-1 3' UTR (primer E)	CTA ATT TTG GAT GGT TTA CTT CTG AGG	63
AMLSLP-186	HMGS-1 5' seq for (primer A)	GGAGCAGATGGTGATTTGATAGT	61
AMLSLP-187	myo-2p rev (primer C)	GTA TCC CTC AAT GTC TCT ACT TGT	62
AMLSLP-188	HMGS-1 in the deleted sequence 5' (primer B)	GAT GTC GAC TCC TTC AAT ATC CG	63
dCAPS analysis	Allele Name
AMSLP-20	isp-1 (qm150) rev	TCTAATACGTCCAGAAGCGTC	59	BamHI cuts wt but not qm150 DNA
AMSLP-21	isp-1 (qm150) for	AGTGTGCACCCATCTTGGATGGATC	55	BamHI cuts wt but not qm150 DNA
AMSLP-51	atfs-1 (et15) rev	CCT CACTGA ATC GGAGAA GC	59	Hpy188I cuts wt but not et15 DNA
AMSLP-102	atfs-1 (et15) for	CCATCAAAATGTTTTCCCGTTCGG	55	Hpy188I cuts wt but not et15 DNA
Sequencing of gfp fusion genes in fosmids	Target sequence
AMS-141	GFP	TTT GTG CCC ATT AAC ATC ACC ATC	62
AMS-145	GFP	AA CAC CAT AAC AGA AAG TAG TGA C	62
AMS-146	coq-1	GTA CGG TCG AAA TTT GGG AAT CGC	65
qPCR	Gene Name
*	act-1	ACGACGAGTCCGGCCCATCC	66
*	act-1	GAAAGCTGGTGGTGACGATGGTT	64
AMSLP-26	hmgs-1	CAGCAGATGATTGCGTCACC	59
AMSLP-27	hmgs-1	GCCCTTATTGCGACTTGACG	59
AMSLP-28	hmgs-1	CCAGATGCTTCTATTCCGATTGA	59
AMSLP-29	hmgs-1	TCGGCGTAATTGGCTTAAAGA	59
AMSLP-30	hmgr-1	CCTGCAGAGCAAGCTATTCCA	60
AMSLP-31	hmgr-1	GCAGCATTCGGTTGCCAAAG	61
AMSLP-34	pmp-3	GTTCCCGTGTTCATCACTCAT	59
AMSLP-35	pmp-3	ACACCGTCGAGAAGCTGTAGA	61
AMSLP-36	gfp	TGTTCCATGGCCAACACTTG	59
AMSLP-37	gfp	CGGGCATGGCACTCTTGAA	61
AMSLP-48	hsp-6	AGCCAAAAGACAGGCCGTTA	59
AMSLP-49	hsp-6	ACGACCTTTAAGTCCTTTTGAACC	59
AMSLP-85	y48e1b.3	ATGGATGTTTCTGGAGTCAAGGC	60
AMSLP-86	y48e1b.3	TGCTCTTTGTCTCCGTCGAG	60
AMSLP-87	m57.2	CTGAGGAGGAGGAGAAGACGA	60
AMSLP-88	m57.2	GGATTTCGGGTTCGACTTAATACAC	60
AMSLP-89	ggtb-1	TCAAAGCAGCTCGAGAGAATGT	60
AMSLP-90	ggtb-1	TGACCAGGAGCAGGTCCATA	60
AMSLP-91	y46g5a.2	TCTCCACTTCACGCCTTCAC	60
AMSLP-92	y46g5a.2	GGAGTGTAGACGCCTGCATA	60
AMSLP-93	t06d8.5	ACATGATCTCTCAAAGGTGCGT	60
AMSLP-94	t06d8.5	ACAAGACCAGCGTCAAGTCC	60
AMSLP-95	coq-1	GCCGAAATGATCCATACAGCG	60
AMSLP-96	coq-1	CTCCGACGAGCACTGACATT	60
AMSLP-97	fnta-1	GCGCGCTAAAAAGCTCTACA	60
AMSLP-98	fnta-1	CTTGGCAGTGACCTTCGTCT	60
AMSLP-99	fntb-1	TTCAAGACCACAAGCGACGA	60
AMSLP-100	fntb-1	AGCGTCTAAGGTTGCGTAGC	60
* The act-1 primers were obtained from Benjamin Podbilewicz laboratory, Technion, Israel

## Sheet: Sheet2
	Ceh-23 for1					attgcactcgagctgcagACT TTG CCA GTT TCA ACG CCG C
	Ceh-23 for 2					attgcactcgagctgcagCAG ACG TTC TTC AAA CAA TTG CTG C
	Ceh-23 rev 1					tatatactgcagctcgagGCT GCT CTC CGA CTA TGT GCC ATA C
	Ceh-23 rev 2					tatatactgcagctcgagATT CCT GAA GTT CCA GCA GCT GG
	rheb-1 for 1					attgcactcgagctgcagGTG AAG ATG AGC AGT TCG CTG C
	rheb-1 for 2					attgcactcgagctgcagTGG CCG TTA TGG GAT ATC CTC ATG
	rheb-1 rev 1					tatatactgcagctcgagAAC TCA CCG ATT CTC TGG CCG
	rheb-1 rev 2					tatatactgcagctcgagAAC TTC GCA TCC CAT TGT CTA GC
